# Supplementary material for: A Novel Bioanalytical Method for Determination of Inotodiol Isolated from Inonotus Obliquus and Its Application to Pharmacokinetic Study
Source: MDPI journal article supplement (doi:10.3390/plants10081631), 2021-08-09
Supplement: s1 [file s1]

SUPPLEMENTARY MATERIAL

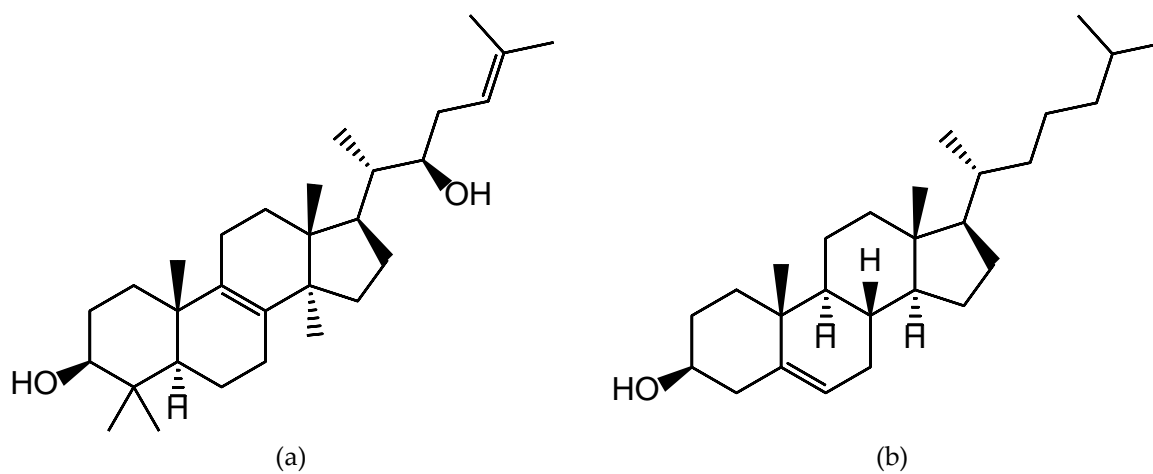

**Figure S1** Chemical structure of (a) inotodiol and (b) cholesterol.

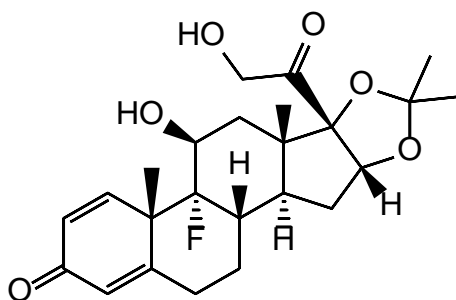

**Figure S2** Chemical structure of Triamcinolone acetonide used for internal standard (IS).

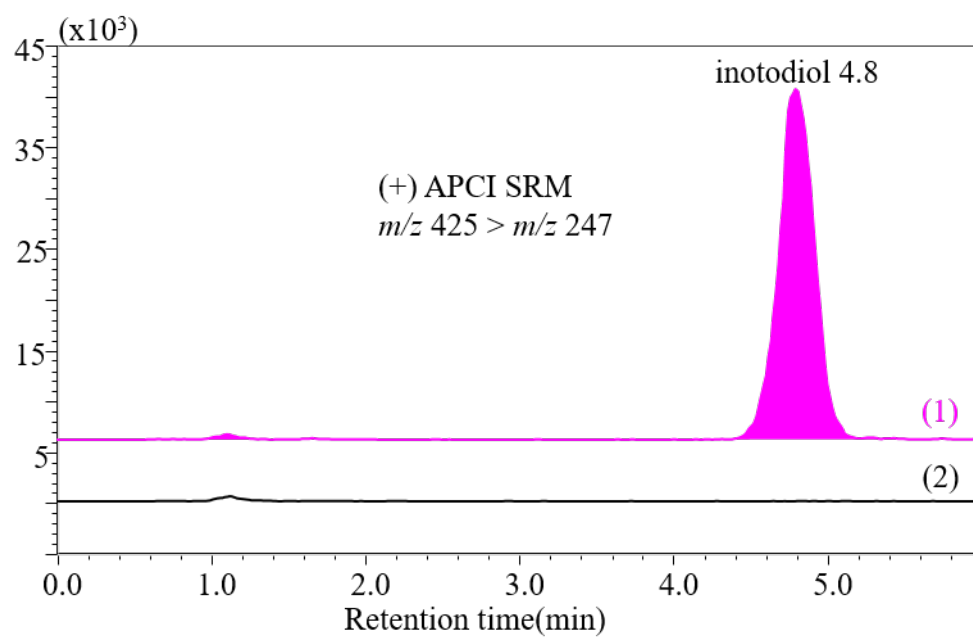

**Figure S3** Selected reaction monitoring chromatogram of inotodiol for carry over (injection order: (1) ULOQ sample, (2) blank sample).

**Table S1** Percentages of back calculated concentration from equation of calibration curve for inotodiol (n=3).

| Amount<br>(ng/mL) | Peak area of<br>inotodiol | Peak area of<br>IS | Area ratio of<br>inotodiol/IS | Back calculation<br>(%) |
|-------------------|---------------------------|--------------------|-------------------------------|-------------------------|
| 4                 | 8510                      | 357000             | 0.0238                        | 117.1                   |
|                   | 5760                      | 268000             | 0.0215                        | 106.1                   |
|                   | 6890                      | 303700             | 0.0227                        | 111.7                   |
| 25                | 46700                     | 348600             | 0.1339                        | 111.8                   |
|                   | 42800                     | 291500             | 0.1468                        | 111.5                   |
|                   | 47400                     | 325300             | 0.1458                        | 110.8                   |
| 50                | 91000                     | 378200             | 0.2407                        | 91.2                    |
|                   | 85100                     | 322600             | 0.2637                        | 99.9                    |
|                   | 84200                     | 318000             | 0.2647                        | 100.3                   |
| 100               | 177700                    | 354100             | 0.5017                        | 94.8                    |
|                   | 160200                    | 301600             | 0.5310                        | 100.4                   |
|                   | 190100                    | 336000             | 0.5657                        | 106.9                   |
| 200               | 388100                    | 398900             | 0.9729                        | 91.9                    |
|                   | 306800                    | 297700             | 1.0303                        | 97.3                    |
|                   | 378500                    | 349700             | 1.0821                        | 102.2                   |
| 300               | 527800                    | 354700             | 1.4880                        | 93.6                    |
|                   | 518100                    | 310700             | 1.6676                        | 104.9                   |
|                   | 507500                    | 298600             | 1.6997                        | 106.9                   |

**Table S2** Internal standard-normalised matrix factor and coefficient of variation of quality control samples.

|          | MF of low QC | MF of middle QC | MF of high QC |
|----------|--------------|-----------------|---------------|
| Sample 1 | 105.5        | 107.0           | 95.7          |
| Sample 2 | 115.8        | 108.1           | 101.2         |
| Sample 3 | 109.9        | 107.8           | 102.6         |
| Sample 4 | 111.9        | 108.4           | 96.7          |
| Sample 5 | 107.1        | 105.7           | 101.3         |
| Mean     | 110.0        | 107.4           | 99.5          |
| CV       | 3.3          | 0.9             | 2.8           |

**Table S3** Dilution integrity of inotodiol after 3 times dilution (n=5).

| Original concentration | Found after dilution | Mean accuracy | CV  |
|------------------------|----------------------|---------------|-----|
| (ng/mL)                | mean $\pm$ SD        | (%)           | (%) |
| 330                    | 104.3 $\pm$ 3.8      | 94.8          | 3.6 |
| 500                    | 171.9 $\pm$ 6.3      | 107.5         | 3.7 |
| 700                    | 243.4 $\pm$ 4.3      | 104.5         | 1.8 |
